# Supplementary material
Source: PubMed Central journal article supplement (PMC9625088)
Supplement: CJN.16751221SupplementaryData.pdf [file CJN.16751221SupplementaryData.pdf]

## **Supplemental Material**

Supplemental Table 1. Promising Biomarkers of Kidney Disease in Urinary EVs

Supplemental Table 2. Circulating EVs as Biomarkers in Kidney Disease

**Supplemental Table 1.** Promising Biomarkers of Kidney Disease in Urinary EVs

| Biomarker |                                                                          | Origin       | Isolation method                             | Disease                                                            | Source                            |
|-----------|--------------------------------------------------------------------------|--------------|----------------------------------------------|--------------------------------------------------------------------|-----------------------------------|
| EV type   | Increased pEVs                                                           | Human        | Total Exosome Isolation Reagent (Invitrogen) | Podocyte and early glomerular damage in hypertension               | Kwon et al, <sup>1</sup> 2017     |
|           | Increased p16 <sup>+</sup> EVs                                           | Human        | Total Exosome Isolation Reagent              | Proximal tubular cellular senescence in hypertension               | Santelli et al, <sup>2</sup> 2019 |
|           | Increased pEVs                                                           | Swine; human | Total Exosome Isolation Reagent              | Podocyte injury in MetS-related kidney disease                     | Zhang et al, <sup>3</sup> 2019    |
|           | Decreased urinary CD133 <sup>+</sup> EVs                                 | Human        | Ultra-centrifugation, filtration             | Transplant recipients with slow graft function and vascular damage | Dimuccio et al, <sup>4</sup> 2014 |
|           | Increased urinary podocin <sup>+</sup> to nephrin <sup>+</sup> EVs ratio | Human        | Direct analysis without EV isolation         | Kidney injury in preeclampsia                                      | Gilani et al, <sup>5</sup> 2017   |
|           | Decreased density of EVs                                                 | Human        | Ultracentrifugation                          | Kidney function in patients with diabetes                          | Kaminska et al, <sup>6</sup> 2016 |

|                   |                                                                           |             |                                             |                          |                                   |
|-------------------|---------------------------------------------------------------------------|-------------|---------------------------------------------|--------------------------|-----------------------------------|
|                   | Increased podocalyxin <sup>+</sup> micro-particles                        | Mice        | Ultracentrifugation                         | Glomerular injury in DKD | Burger et al, <sup>7</sup> 2014   |
|                   | Increased podocyte-released migrasomes                                    | Human; mice | Sequential centrifugation, filtration       | DKD                      | Liu et al, <sup>8</sup> 2020      |
|                   | Increased annexin V <sup>+</sup> podocalyxin <sup>+</sup> micro-particles | Human       | Ultracentrifugation                         | LN                       | Lu et al, <sup>9</sup> 2019       |
| <b>EV protein</b> | Increased $\alpha_1$ -antitrypsin                                         | Human       | Ultracentrifugation                         | DKD                      | Ning et al, <sup>10</sup> 2020    |
|                   | Increased ELF3                                                            | Human       | Sequential centrifugation                   | Podocyte injuries in DKD | Sakurai et al, <sup>11</sup> 2019 |
|                   | Decreased regucalcin                                                      | Human; rat  | Ultracentrifugation in combination with DTT | DKD                      | Zubiri et al, <sup>12</sup> 2015  |
|                   | Increased dipeptidyl peptidase-IV                                         | Human       | Immunoprecipitation                         | Increased UACR in DKD    | Sun et al, <sup>13</sup> 2012     |
|                   | Increased uromodulin                                                      | Human       | Filtration                                  | DKD                      | Lou et al, <sup>14</sup> 2017     |

|                                                                                                   |       |                                                               |                                                                      |                                                |
|---------------------------------------------------------------------------------------------------|-------|---------------------------------------------------------------|----------------------------------------------------------------------|------------------------------------------------|
| Increased CD3                                                                                     | Human | Ultracentrifugation                                           | Kidney transplant rejection                                          | Park et al, <sup>15</sup><br>2017              |
| Phosphoenolpyruvate<br>carboxy-kinase                                                             | Human | Ultracentrifuga-<br>tion, size<br>exclusion<br>chromatography | GFR after kidney transplant                                          | Braun et al, <sup>16</sup><br>2020             |
| Decreased AQP2                                                                                    | Human | Ultracentrifugation                                           | Acute disturbance in water<br>homeostasis after kidney<br>transplant | Oshikawa-<br>Hori et al, <sup>17</sup><br>2019 |
| Increased NGAL                                                                                    | Human | Ultracentrifugation                                           | Delayed graft function after<br>kidney transplant                    | Alvarez et<br>al, <sup>18</sup> 2013           |
| Increased CP, MMP9,<br>PODXL, CAIX, DKK4<br>Decreased CD10,<br>EMMPRIN, DPEP1,<br>syntenin1, AQP1 | Human | Ultracentrifugation                                           | RCC                                                                  | Raimondo et<br>al, <sup>19</sup> 2013          |
| Increased periplakin,<br>envoplakin, villin-1,<br>C3, C9                                          | Human | Ultracentrifugation                                           | Autosomal dominant PKD                                               | Salih et al, <sup>20</sup><br>2016             |

|                                                                                                     |       |                                            |                                                            |                                     |
|-----------------------------------------------------------------------------------------------------|-------|--------------------------------------------|------------------------------------------------------------|-------------------------------------|
| Decreased AQP-2<br>Increased APO-A1                                                                 | Human | Double sucrose cushion ultracentrifugation | Impaired concentrating capability and decreased GFR in PKD | Pocsfalvi et al, <sup>21</sup> 2015 |
| Decreased PC1:TMEM2 or PC2:TMEM2 ratio                                                              | Human | Ultracentrifugation                        | PKD                                                        | Hogan et al, <sup>22</sup> 2015     |
| Decreased aquaporin-2                                                                               | Rat   | Sequential centrifugation                  | Cisplatin-induced kidney injury                            | Sonoda et al, <sup>23</sup> 2019    |
| Increased GluAp                                                                                     | Rat   | Sequential centrifugation                  | Cisplatin-induced kidney injury                            | Quesada et al, <sup>24</sup> 2017   |
| Increased PTC-EMPs                                                                                  | Human | Total Exosome Isolation Reagent            | Hypertensive micro-circulation kidney injury               | Sun et al, <sup>25</sup> 2018       |
| Increased $\alpha_1$ -antitrypsin, cerulo-plasmin<br>Decreased amino-peptidase N, vasorin precursor | Human | Sucrose cushion ultracentrifugation        | IgA nephropathy                                            | Moon et al, <sup>26</sup> 2011      |

|                                                                          |       |                                              |                                                  |                                             |
|--------------------------------------------------------------------------|-------|----------------------------------------------|--------------------------------------------------|---------------------------------------------|
| Increased vasorin precursor                                              | Human | Sucrose cushion ultracentrifugation          | Thin basement membrane nephropathy               | Moon et al, <sup>26</sup> 2011              |
| Increased TGF- $\beta$ ,<br>L1CAM<br>Decreased E-cadherin,<br>N-cadherin | Human | Sequential centrifugation                    | Obstructive nephropathy                          | Trnka et al, <sup>27</sup> 2012             |
| Increased uroplakins and plakins                                         | Human | Size exclusion chromatography                | Calcineurin inhibitor-induced fibrosis of kidney | Carreras-Planella et al, <sup>28</sup> 2020 |
| Decreased CD133                                                          | Human | Filtration, ultracentrifugation              | Acute and chronic glomerular damage              | Dimuccio et al, <sup>29</sup> 2020          |
| Decreased $\beta_1$ subunit of V-ATPase                                  | Human | Sucrose cushion ultracentrifugation          | Distal tubular acidosis                          | Pathare et al, <sup>30</sup> 2018           |
| Increased osteoprotegerin                                                | Human | Sucrose cushion ultracentrifugation with DTT | CKD                                              | Benito-Martin et al, <sup>31</sup> 2013     |

|                   |                                                                             |               |                                                          |                                                                        |                                           |
|-------------------|-----------------------------------------------------------------------------|---------------|----------------------------------------------------------|------------------------------------------------------------------------|-------------------------------------------|
|                   | Increased cerulo-plasmin                                                    | Human;<br>rat | Ultracentrifugation<br>with DTT                          | Nondiabetic CKD                                                        | Gudehithlu et<br>al, <sup>32</sup> 2019   |
|                   | Increased podocin to<br>nephrin ratio                                       | Rat           | Ultracentrifugation                                      | Zucker diabetic fatty rats<br>and PAN nephritis                        | Fujitaka et<br>al, <sup>33</sup> 2021     |
|                   | Decreased AQP1, AQP2                                                        | Rat           | Sequential<br>centrifugation                             | IRI                                                                    | Asvapromtada<br>et al, <sup>34</sup> 2018 |
|                   | Increased caveolin-2                                                        | Rat           | Ultracentrifugation                                      | Bilateral ureteral<br>obstruction and mercuric<br>chloride-induced AKI | Bulacio et<br>al, <sup>35</sup> 2019      |
| <b>EV<br/>RNA</b> | Increased miR-4534                                                          | Human         | Exosome Isolation<br>Kit (System<br>Biosciences,<br>LLC) | DKD                                                                    | Zhao et al, <sup>36</sup><br>2020         |
|                   | Increased miR-451-5p                                                        | Rat           | Sequential<br>centrifugation                             | DKD                                                                    | Mohan et al, <sup>37</sup><br>2016        |
|                   | Increased miR-362-3p,<br>miR-877-3p, miR-150-<br>5p<br>Decreased miR-15a-5p | Human         | Sequential<br>centrifugation                             | DKD                                                                    | Xie et al, <sup>38</sup><br>2017          |

|                                             |       |                                                                                            |                      |                                    |
|---------------------------------------------|-------|--------------------------------------------------------------------------------------------|----------------------|------------------------------------|
| Increased miR-192                           | Human | Sequential centrifugation                                                                  | Early-stage DKD      | Jia et al, <sup>39</sup> 2016      |
| Increased miR-15b, miR-34a, miR-636         | Human | Ultracentrifugation                                                                        | DKD                  | Eissa et al, <sup>40</sup> 2016    |
| Increased miR-21-5p<br>Decreased miR-30b-5p | Human | miRCURY Exosome Kit (Qiagen)                                                               | DKD                  | Zang et al, <sup>41</sup> 2019     |
| Increased uromodulin mRNA                   | Human | EV collection tubes (Hitachi Chemical Diagnostics, Inc [now Minaris Medical America, Inc]) | DKD                  | Yamamoto et al, <sup>42</sup> 2018 |
| Increased WT1 mRNA                          | Human | Sucrose cushion ultracentrifugation                                                        | DKD                  | Abe et al, <sup>43</sup> 2018      |
| Increased mRNA of BMP7, CXCL14,             | Human | EXOPRO Urine Clinical Sample                                                               | Transplant rejection | El Fekih et al, <sup>44</sup> 2021 |



|  |                                                              |       |                                                                                                   |                                                       |                                      |
|--|--------------------------------------------------------------|-------|---------------------------------------------------------------------------------------------------|-------------------------------------------------------|--------------------------------------|
|  | CXCL11, B2M, IL32,<br>C3, CD74, CD44,<br>IFNAR2              |       | Concentrator Kit<br>(Exosome<br>Diagnostics)                                                      |                                                       |                                      |
|  | Increased miR-155-5p<br>Decreased miR-223-3p,<br>miR-1228-3p | Human | Filtration                                                                                        | Effect of tacrolimus therapy<br>in kidney transplant  | Freitas et al, <sup>45</sup><br>2020 |
|  | Increased BKV-miR-B1-<br>5p, bkv-miR-B1-<br>5p/miR-16        | Human | Isolation of<br>exosomal RNA<br>from urine<br>(exoRNeasy<br>Serum/Plasma<br>Midi Kits;<br>QIAGEN) | BKV nephropathy in<br>kidney transplant<br>recipients | Kim et al, <sup>46</sup><br>2017     |
|  | Increased miR-21, miR-<br>150<br>Decreased miR-29c           | Human | miRCURY<br>Exosome<br>Isolation Kit<br>(Exiqon)                                                   | Kidney fibrosis in LN                                 | Sole et al, <sup>47</sup><br>2019    |
|  | Decreased miR-29c                                            | Human | Sequential<br>centrifugation                                                                      | Early kidney fibrosis in LN                           | Sole et al, <sup>48</sup><br>2015    |

|                                               |       |                                       |                            |                                           |
|-----------------------------------------------|-------|---------------------------------------|----------------------------|-------------------------------------------|
| Decreased let-7a, miR-21                      | Human | Sequential centrifugation             | Active LN                  | Tangtanatakul et al, <sup>49</sup> 2019   |
| Increased miR-146a                            | Human | Sequential centrifugation             | Active LN                  | Perez-Hernandez et al, <sup>50</sup> 2015 |
| Increased miR-31, miR-107, miR-135b-5p        | Human | miRCURY Exosome Isolation Kit         | Clinical response in LN    | Garcia-Vives et al, <sup>51</sup> 2020    |
| Increased miR-224-5p                          | Human | Sequential centrifugation             | RCC                        | Qin et al, <sup>52</sup> 2021             |
| Decreased GST- $\alpha$ 1, CEBPA, PCBD1 esRNA | Human | Sequential centrifugation, filtration | Clear cell RCC             | De Palma et al, <sup>53</sup> 2016        |
| Decreased miR-30c-5p                          | Human | Sequential centrifugation, filtration | Early-stage clear cell RCC | Song et al, <sup>54</sup> 2019            |
| Increased miR-204-5p, miR-211-5p              | Mouse | miRCURY Exosome Isolation Kit         | Xp11.2 translocation RCC   | Kurahashi et al, <sup>55</sup> 2019       |

|                                                  |       |                                                                                        |                                                  |                                      |
|--------------------------------------------------|-------|----------------------------------------------------------------------------------------|--------------------------------------------------|--------------------------------------|
| Decreased CD13 <sup>-</sup><br>exosomal miR-200b | Human | Sequential<br>centrifugation,<br>filtration                                            | Kidney fibrosis                                  | Yu et al, <sup>56</sup><br>2018      |
| Decreased miR-29c                                | Human | PEG-based<br>precipitation                                                             | Kidney fibrosis                                  | Lv et al, <sup>57</sup><br>2018      |
| Decreased CD2AP<br>mRNA                          | Human | Sequential<br>centrifugation                                                           | Deterioration in kidney<br>function and fibrosis | Lv et al, <sup>58</sup><br>2014      |
| Decreased miR-29c                                | Human | Sequential<br>centrifugation                                                           | Kidney fibrosis                                  | Lv et al, <sup>59</sup><br>2013      |
| Decreased miRNA-181a                             | Human | Sucrose cushion<br>ultracentrifuga-<br>tion with DTT                                   | CKD                                              | Khurana et<br>al, <sup>60</sup> 2017 |
| Increased miR-21                                 | Human | Urine Exosome<br>Purification and<br>RNA Isolation<br>Midi Kit (Norgen<br>Biotek Corp) | CKD                                              | Lange et al, <sup>61</sup><br>2019   |

|  |                                                                      |              |                                                                             |                                            |                                           |
|--|----------------------------------------------------------------------|--------------|-----------------------------------------------------------------------------|--------------------------------------------|-------------------------------------------|
|  | Decreased miR-146a                                                   | Human        | Ultracentrifugation and DTT                                                 | Early kidney injury in hypertension        | Perez-Hernandez et al, <sup>62</sup> 2018 |
|  | Increased CCL2 mRNA                                                  | Human        | Sequential centrifugation                                                   | Kidney damage and dysfunction in IgAN      | Feng et al, <sup>63</sup> 2018            |
|  | Decreased miR-192-5p, miR-194-5p, miR-30a-5p, miR-30d-5p, miR-30e-5p | Human        | Sucrose cushion ultracentrifugation                                         | Autosomal dominant PKD                     | Magayr et al, <sup>64</sup> 2020          |
|  | Increased miR-1224, miR-21                                           | Human; mouse | DTT, filtration, ultracentrifugation                                        | Radiation-induced tubular injury in kidney | Bhayana et al, <sup>65</sup> 2017         |
|  | Increased miR-1225-5p                                                | Human        | Isolation of exosome RNA from urine (RNA Isolation Kit; Norgen Biotek Corp) | Minimal change disease                     | Ramezani et al, <sup>66</sup> 2015        |

|                                                     |                 |                                                                  |                                                        |                                       |
|-----------------------------------------------------|-----------------|------------------------------------------------------------------|--------------------------------------------------------|---------------------------------------|
| Decreased miR-1915,<br>miR-663<br>Increased miR-155 | Human           | Isolation of<br>exosome RNA<br>from urine (RNA<br>Isolation Kit) | FSGS                                                   | Ramezani et<br>al, <sup>66</sup> 2015 |
| Increased miR-26a                                   | Human           | Ultracentrifugation                                              | Podocyte injury in<br>autoimmune<br>glomerulonephritis | Ichii et al, <sup>67</sup><br>2014    |
| Increased mRNA of<br>WT1                            | Mouse;<br>human | Ultracentrifugation<br>with DTT                                  | Podocyte injury                                        | Zhou et al, <sup>68</sup><br>2013     |
| Increased miRNA-21                                  | Human           | Total Exosome<br>Isolation Reagent                               | Scrub typhus-associated<br>AKI                         | Yun et al, <sup>69</sup><br>2021      |
| Increased desmin mRNA                               | Rat             | Ultracentrifugation                                              | PAN nephritis                                          | Fujitaka et<br>al, <sup>33</sup> 2021 |
| Increased cystatin C<br>mRNA                        | Rat             | Ultracentrifugation                                              | PAN-induced podocyte<br>injury                         | Spanu et al, <sup>70</sup><br>2014    |
| Increased miR-16, miR-<br>24, miR-200c              | Rat             | Urine Exosome<br>Purification and<br>RNA Isolation               | IRI                                                    | Sonoda et<br>al, <sup>71</sup> 2019   |

|  |  |  |                        |  |  |
|--|--|--|------------------------|--|--|
|  |  |  | Kit (Norgen<br>Biotek) |  |  |
|--|--|--|------------------------|--|--|

Abbreviations: AKI, acute kidney injury; AQP, aquaporin; B2M,  $\beta$ 2-microglobulin; BKV, BK virus; BMP, bone morphogenetic protein; CAIX, carbonic anhydrase IX; CCL, chemokine (C-C motif) ligand; CD, clusters of differentiation; CD2AP, CD2-associated protein; CEBPA, CCAAT/enhancer binding protein  $\alpha$ ; CKD, chronic kidney disease; CP, ceruloplasmin; CXCL, chemokine (C-X-C motif) ligand; DKD, diabetic kidney disease; DKK, Dickkopf-related protein; DPEP, dipeptidase; DTT, dithiothreitol; ELF3, E74-like factor 3; EMMPRIN, extracellular matrix metalloproteinase inducer; EMP, endothelial microparticle; esRNA, exosomal shuttle RNA; EV, extracellular vesicle; FSGS, focal segmental glomerulosclerosis; GFR, glomerular filtration rate; GluAp, glutamyl aminopeptidase; GST- $\alpha$ 1, glutathione S-transferase  $\alpha$ 1; IFNAR, interferon- $\alpha/\beta$  receptor; IgA, immunoglobulin A; IgAN, immunoglobulin A nephropathy; IL, interleukin; IRI, ischemia-reperfusion injury; L1CAM, L1 cell adhesion molecule; LN, lupus nephritis; MetS, metabolic syndrome; MMP, metalloproteinase; mRNA, messenger RNA; NGAL, neutrophil gelatinase-associated lipocalin; PAN, polyarteritis nodosa; PC, polycystin; PCBD, pterin-4  $\alpha$ -carbinolamine dehydratase; PEG, polyethylene glycol; pEV, podocyte extracellular vesicle; PKD, polycystic kidney disease; PODXL, podocalyxin; PTC, peritubular capillary; RCC, renal cell carcinoma; TGF- $\beta$ , transforming growth factor  $\beta$ ; TMEM, transmembrane protein; UACR, urine albumin to creatinine ratio; WT1, Wilms tumor 1.

**Supplemental Table 2.** Circulating EVs as Biomarkers in Kidney Disease

| <b>Biomarker</b>                            | <b>Origin</b> | <b>Isolation method</b>                               | <b>Disease</b>                            | <b>Source</b>                                       |
|---------------------------------------------|---------------|-------------------------------------------------------|-------------------------------------------|-----------------------------------------------------|
| Increased TIMPs mRNA                        | Human         | Total Exosome Isolation Reagent<br>(Invitrogen)       | Decreased survival<br>with clear cell RCC | Dias et al, <sup>72</sup><br>2020                   |
| Increased GGT activity                      | Human         | Sequential centrifugation,<br>filtration              | Advanced RCC                              | Horie et al, <sup>73</sup><br>2020                  |
| Increased miR-224                           | Human         | Total Exosome Isolation Kit<br>(Invitrogen)           | Worse prognosis with<br>clear cell RCC    | Fujii et al, <sup>74</sup><br>2017                  |
| Increased miRNA-4525                        | Human         | Immunoprecipitation with<br>conjugated magnetic beads | Advanced RCC                              | Muramat-su-<br>Maekawa et<br>al, <sup>75</sup> 2021 |
| Increased miR-301a-3p<br>Decreased miR-1293 | Human         | Total Exosome Isolation Kit                           | Metastatic clear cell<br>RCC              | Dias et al, <sup>76</sup><br>2020                   |
| Increased CAIX                              | Human         | Not clearly described                                 | Clear cell RCC                            | Vergori et<br>al, <sup>77</sup> 2021                |
| Increased miR-210, miR-<br>1233             | Human         | Total Exosome Isolation Reagent                       | Clear cell RCC                            | Zhang et<br>al, <sup>78</sup> 2018                  |
| Increased miR-149-3p,<br>miR-424-3p         | Human         | exoEasy Maxi Kit (Catalog No.<br>76064; QIAGEN)       | RCC                                       | Xiao et al, <sup>79</sup><br>2020                   |

|                                                       |       |                                                                                       |                                                              |                                              |
|-------------------------------------------------------|-------|---------------------------------------------------------------------------------------|--------------------------------------------------------------|----------------------------------------------|
| Decreased miR-92a-1-5p                                |       |                                                                                       |                                                              |                                              |
| Decreased miR-126 e3p, miR-17e5p, miR-21e3p           | Mouse | Ultracentrifugation                                                                   | Cryoablation effects in RCC                                  | Zhang et al, <sup>80</sup> 2018              |
| Increased miR-21                                      | Human | PEG precipitation                                                                     | Interstitial fibrosis and tubular atrophy; kidney transplant | Saejong et al, <sup>81</sup> 2020            |
| Decreased endothelial microparticles                  | Human | Ultracentrifugation                                                                   | Kidney transplant                                            | Qamri et al, <sup>82</sup> 2014              |
| Increased miR-30b, miR-30c, miR-34b, miR-34c, miR-342 | Human | Isolation of exosomal RNA from urine (Exosomal RNA Isolation Kit; Norgen Biotek Corp) | Minimal change disease                                       | Ramezani et al, <sup>66</sup> 2015           |
| Increased miR-4449                                    | Human | ExoQuick isolation agent (System Biosciences)                                         | DKD                                                          | Kim et al, <sup>83</sup> 2019                |
| Increased cystatin C and CD14                         | Human | Precipitation                                                                         | Cardiorenal syndrome in patients with dyspnea                | Verbree-Willem-sen et al, <sup>84</sup> 2020 |

Abbreviations: CAIX, carbonic anhydrase IX; CD, clusters of differentiation; DKD, diabetic kidney disease; EV, extracellular vesicle; GGT,  $\gamma$ -glutamyltransferase; miRNA, microRNA; mRNA, messenger RNA; PEG, polyethylene glycol; RCC, renal cell carcinoma; TIMPs, tissue inhibitors of metalloproteinases.



1. Kwon SH, Woollard JR, Saad A, Garovic VD, Zand L, Jordan KL, Textor SC, Lerman LO: Elevated urinary podocyte-derived extracellular microvesicles in renovascular hypertensive patients. *Nephrol Dial Transplant*, 32: 800-807, 2017 10.1093/ndt/gfw077
2. Santelli A, Sun IO, Eirin A, Abumoawad AM, Woollard JR, Lerman A, Textor SC, Puranik AS, Lerman LO: Senescent kidney cells in hypertensive patients release urinary extracellular vesicles. *J Am Heart Assoc*, 8: e012584, 2019 10.1161/JAHA.119.012584
3. Zhang LH, Zhu XY, Eirin A, Nargesi AA, Woollard JR, Santelli A, Sun IO, Textor SC, Lerman LO: Early podocyte injury and elevated levels of urinary podocyte-derived extracellular vesicles in swine with metabolic syndrome: role of podocyte mitochondria. *Am J Physiol Renal Physiol*, 317: F12-F22, 2019 10.1152/ajprenal.00399.2018
4. Dimuccio V, Ranghino A, Pratico Barbato L, Fop F, Biancone L, Camussi G, Bussolati B: Urinary CD133+ extracellular vesicles are decreased in kidney transplanted patients with slow graft function and vascular damage. *PLoS One*, 9: e104490, 2014 10.1371/journal.pone.0104490
5. Gilani SI, Anderson UD, Jayachandran M, Weissgerber TL, Zand L, White WM, Milic N, Suarez MLG, Vallapureddy RR, Naav A, Erlandsson L, Lieske JC, Grande JP, Nath KA, Hansson SR, Garovic VD: Urinary extracellular vesicles of podocyte origin and renal injury in preeclampsia. *J Am Soc Nephrol*, 28: 3363-3372, 2017 10.1681/ASN.2016111202
6. Kaminska A, Platt M, Kasprzyk J, Kusnierz-Cabala B, Gala-Bladzinska A, Woznicka O, Jany BR, Krok F, Piekoszewski W, Kuzniewski M, Stepien EL: Urinary extracellular vesicles: potential biomarkers of renal function in diabetic patients. *J Diabetes Res*, 2016: 5741518, 2016 10.1155/2016/5741518
7. Burger D, Thibodeau JF, Holterman CE, Burns KD, Touyz RM, Kennedy CR: Urinary podocyte microparticles identify prealbuminuric diabetic glomerular injury. *J Am Soc Nephrol*, 25: 1401-1407, 2014 10.1681/ASN.2013070763
8. Liu Y, Li S, Rong W, Zeng C, Zhu X, Chen Q, Li L, Liu ZH, Zen K: Podocyte-released migrasomes in urine serve as an indicator for early podocyte injury. *Kidney Dis (Basel)*, 6: 422-433, 2020 10.1159/000511504
9. Lu J, Hu ZB, Chen PP, Lu CC, Zhang JX, Li XQ, Yuan BY, Huang SJ, Ma KL: Urinary podocyte microparticles are associated with disease activity and renal injury in systemic lupus erythematosus. *BMC Nephrol*, 20: 303, 2019 10.1186/s12882-019-1482-z
10. Ning J, Xiang Z, Xiong C, Zhou Q, Wang X, Zou H: Alpha1-antitrypsin in urinary extracellular vesicles: a potential biomarker of diabetic kidney disease prior to microalbuminuria. *Diabetes Metab Syndr Obes*, 13: 2037-2048, 2020 10.2147/DMSO.S250347
11. Sakurai A, Ono H, Ochi A, Matsuura M, Yoshimoto S, Kishi S, Murakami T, Tominaga T, Nagai K, Abe H, Doi T: Involvement of Elf3 on Smad3 activation-dependent injuries in podocytes and excretion of urinary exosome in diabetic nephropathy. *PLoS One*, 14: e0216788, 2019 10.1371/journal.pone.0216788
12. Zubiri I, Posada-Ayala M, Benito-Martin A, Maroto AS, Martin-Lorenzo M, Cannata-Ortiz P, de la Cuesta F, Gonzalez-Calero L, Barderas MG, Fernandez-Fernandez B, Ortiz A, Vivanco F, Alvarez-Llamas G: Kidney tissue proteomics reveals regucalcin downregulation in response to diabetic nephropathy with reflection in urinary exosomes. *Transl Res*, 166: 474-484, 2015 10.1016/j.trsl.2015.05.007
13. Sun AL, Deng JT, Guan GJ, Chen SH, Liu YT, Cheng J, Li ZW, Zhuang XH, Sun FD, Deng HP: Dipeptidyl peptidase-IV is a potential molecular biomarker in diabetic kidney disease. *Diab Vasc Dis Res*, 9: 301-308, 2012 10.1177/1479164111434318

14. Lou NJ, Ni YH, Jia HY, Deng JT, Jiang L, Zheng FJ, Sun AL: Urinary microvesicle-bound uromodulin: a potential molecular biomarker in diabetic kidney disease. *J Diabetes Res*, 2017: 3918681, 2017 10.1155/2017/3918681
15. Park J, Lin HY, Assaker JP, Jeong S, Huang CH, Kurdi T, Lee K, Fraser K, Min C, Eskandari S, Routray S, Tannous B, Abdi R, Riella L, Chandraker A, Castro CM, Weissleder R, Lee H, Azzi JR: Integrated kidney exosome analysis for the detection of kidney transplant rejection. *ACS Nano*, 11: 11041-11046, 2017 10.1021/acsnano.7b05083
16. Braun F, Rinschen M, Buchner D, Bohl K, Plagmann I, Bachurski D, Richard Spath M, Antczak P, Gobel H, Klein C, Lackmann JW, Kretz O, Puelles VG, Wahba R, Hallek M, Schermer B, Benzing T, Huber TB, Beyer A, Stippel D, Kurschat CE, Muller RU: The proteomic landscape of small urinary extracellular vesicles during kidney transplantation. *J Extracell Vesicles*, 10: e12026, 2020 10.1002/jev2.12026
17. Oshikawa-Hori S, Yokota-Ikeda N, Sonoda H, Ikeda M: Urinary extracellular vesicular release of aquaporins in patients with renal transplantation. *BMC Nephrol*, 20: 216, 2019 10.1186/s12882-019-1398-7
18. Alvarez S, Suazo C, Boltansky A, Ursu M, Carvajal D, Innocenti G, Vukusich A, Hurtado M, Villanueva S, Carreno JE, Rogelio A, Irrazabal CE: Urinary exosomes as a source of kidney dysfunction biomarker in renal transplantation. *Transplant Proc*, 45: 3719-3723, 2013 10.1016/j.transproceed.2013.08.079
19. Raimondo F, Morosi L, Corbetta S, Chinello C, Brambilla P, Della Mina P, Villa A, Albo G, Battaglia C, Bosari S, Magni F, Pitto M: Differential protein profiling of renal cell carcinoma urinary exosomes. *Mol Biosyst*, 9: 1220-1233, 2013 10.1039/c3mb25582d
20. Salih M, Demmers JA, Bezstarosti K, Leonhard WN, Losekoot M, van Kooten C, Gansevoort RT, Peters DJ, Zietse R, Hoorn EJ, Consortium D: Proteomics of urinary vesicles links plakins and complement to polycystic kidney disease. *J Am Soc Nephrol*, 27: 3079-3092, 2016 10.1681/ASN.2015090994
21. Pocsfalvi G, Raj DA, Fiume I, Vilasi A, Trepiccione F, Capasso G: Urinary extracellular vesicles as reservoirs of altered proteins during the pathogenesis of polycystic kidney disease. *Proteomics Clin Appl*, 9: 552-567, 2015 10.1002/prca.201400199
22. Hogan MC, Bakeberg JL, Gainullin VG, Irazabal MV, Harmon AJ, Lieske JC, Charlesworth MC, Johnson KL, Madden BJ, Zenka RM, McCormick DJ, Sundsbak JL, Heyer CM, Torres VE, Harris PC, Ward CJ: Identification of biomarkers for PKD1 using urinary exosomes. *J Am Soc Nephrol*, 26: 1661-1670, 2015 10.1681/ASN.2014040354
23. Sonoda H, Oshikawa-Hori S, Ikeda M: An early decrease in release of aquaporin-2 in urinary extracellular vesicles after cisplatin treatment in rats. *Cells*, 8, 2019 10.3390/cells8020139
24. Quesada A, Segarra AB, Montoro-Molina S, de Gracia MD, Osuna A, O'Valle F, Gomez-Guzman M, Vargas F, Wangensteen R: Glutamyl aminopeptidase in microvesicular and exosomal fractions of urine is related with renal dysfunction in cisplatin-treated rats. *PLoS One*, 12: e0175462, 2017 10.1371/journal.pone.0175462
25. Sun IO, Santelli A, Abumoawad A, Eirin A, Ferguson CM, Woollard JR, Lerman A, Textor SC, Puranik AS, Lerman LO: Loss of renal peritubular capillaries in hypertensive patients is detectable by urinary endothelial microparticle levels. *Hypertension*, 72: 1180-1188, 2018 10.1161/HYPERTENSIONAHA.118.11766
26. Moon PG, Lee JE, You S, Kim TK, Cho JH, Kim IS, Kwon TH, Kim CD, Park SH, Hwang D, Kim YL, Baek MC: Proteomic analysis of urinary exosomes from patients of early IgA nephropathy and thin basement membrane nephropathy. *Proteomics*, 11: 2459-2475, 2011 10.1002/pmic.201000443

27. Trnka P, Ivanova L, Hiatt MJ, Matsell DG: Urinary biomarkers in obstructive nephropathy. *Clin J Am Soc Nephrol*, 7: 1567-1575, 2012 10.2215/CJN.09640911
28. Carreras-Planella L, Juega J, Taco O, Canas L, Franquesa M, Lauzurica R, Borrás FE: Proteomic characterization of urinary extracellular vesicles from kidney-transplanted patients treated with calcineurin inhibitors. *Int J Mol Sci*, 21, 2020 10.3390/ijms21207569
29. Dimuccio V, Peruzzi L, Brizzi MF, Cocchi E, Fop F, Boido A, Gili M, Gallo S, Biancone L, Camussi G, Bussolati B: Acute and chronic glomerular damage is associated with reduced CD133 expression in urinary extracellular vesicles. *Am J Physiol Renal Physiol*, 318: F486-F495, 2020 10.1152/ajprenal.00404.2019
30. Pathare G, Dhayat NA, Mohebbi N, Wagner CA, Bobulescu IA, Moe OW, Fuster DG: Changes in V-ATPase subunits of human urinary exosomes reflect the renal response to acute acid/alkali loading and the defects in distal renal tubular acidosis. *Kidney Int*, 93: 871-880, 2018 10.1016/j.kint.2017.10.018
31. Benito-Martin A, Ucero AC, Zubiri I, Posada-Ayala M, Fernandez-Fernandez B, Cannata-Ortiz P, Sanchez-Nino MD, Ruiz-Ortega M, Egido J, Alvarez-Llamas G, Ortiz A: Osteoprotegerin in exosome-like vesicles from human cultured tubular cells and urine. *PLoS One*, 8: e72387, 2013 10.1371/journal.pone.0072387
32. Gudehithlu KP, Hart P, Joshi A, Garcia-Gomez I, Cimbaluk DJ, Dunea G, Arruda JAL, Singh AK: Urine exosomal ceruloplasmin: a potential early biomarker of underlying kidney disease. *Clin Exp Nephrol*, 23: 1013-1021, 2019 10.1007/s10157-019-01734-5
33. Fujitaka K, Murakami T, Takeuchi M, Kakimoto T, Mochida H, Arakawa K: mRNAs in urinary nano-extracellular vesicles as potential biomarkers for non-invasive kidney biopsy. *Biomed Rep*, 14: 11, 2021 10.3892/br.2020.1387
34. Asvapromtada S, Sonoda H, Kinouchi M, Oshikawa S, Takahashi S, Hoshino Y, Sinlapadeelerdkul T, Yokota-Ikeda N, Matsuzaki T, Ikeda M: Characterization of urinary exosomal release of aquaporin-1 and -2 after renal ischemia-reperfusion in rats. *Am J Physiol Renal Physiol*, 314: F584-F601, 2018 10.1152/ajprenal.00184.2017
35. Bulacio RP, Nosetto EC, Brandoni A, Torres AM: Novel finding of caveolin-2 in apical membranes of proximal tubule and first detection of caveolin-2 in urine: a promising biomarker of renal disease. *J Cell Biochem*, 120: 4966-4974, 2019 10.1002/jcb.27772
36. Zhao Y, Shen A, Guo F, Song Y, Jing N, Ding X, Pan M, Zhang H, Wang J, Wu L, Ma X, Feng L, Qin G: Urinary exosomal MiRNA-4534 as a novel diagnostic biomarker for diabetic kidney disease. *Front Endocrinol (Lausanne)*, 11: 590, 2020 10.3389/fendo.2020.00590
37. Mohan A, Singh RS, Kumari M, Garg D, Upadhyay A, Ecelbarger CM, Tripathy S, Tiwari S: Urinary exosomal microRNA-451-5p is a potential early biomarker of diabetic nephropathy in rats. *PLoS One*, 11: e0154055, 2016 10.1371/journal.pone.0154055
38. Xie Y, Jia Y, Cuihua X, Hu F, Xue M, Xue Y: Urinary exosomal microRNA profiling in incipient type 2 diabetic kidney disease. *J Diabetes Res*, 2017: 6978984, 2017 10.1155/2017/6978984
39. Jia Y, Guan M, Zheng Z, Zhang Q, Tang C, Xu W, Xiao Z, Wang L, Xue Y: miRNAs in urine extracellular vesicles as predictors of early-stage diabetic nephropathy. *J Diabetes Res*, 2016: 7932765, 2016 10.1155/2016/7932765
40. Eissa S, Matboli M, Aboushabha R, Bekhet MM, Soliman Y: Urinary exosomal microRNA panel unravels novel biomarkers for diagnosis of type 2 diabetic kidney disease. *J Diabetes Complications*, 30: 1585-1592, 2016 10.1016/j.jdiacomp.2016.07.012
41. Zang J, Maxwell AP, Simpson DA, McKay GJ: Differential expression of urinary exosomal microRNAs miR-21-5p and miR-30b-5p in individuals with diabetic kidney disease. *Sci Rep*, 9: 10900, 2019 10.1038/s41598-019-47504-x

42. Yamamoto CM, Murakami T, Oakes ML, Mitsuhashi M, Kelly C, Henry RR, Sharma K: Uromodulin mRNA from urinary extracellular vesicles correlate to kidney function decline in type 2 diabetes mellitus. *Am J Nephrol*, 47: 283-291, 2018 10.1159/000489129
43. Abe H, Sakurai A, Ono H, Hayashi S, Yoshimoto S, Ochi A, Ueda S, Nishimura K, Shibata E, Tamaki M, Kishi F, Kishi S, Murakami T, Nagai K, Doi T: Urinary exosomal mRNA of WT1 as diagnostic and prognostic biomarker for diabetic nephropathy. *J Med Invest*, 65: 208-215, 2018 10.2152/jmi.65.208
44. El Fekih R, Hurley J, Tadigotla V, Alghamdi A, Srivastava A, Coticchia C, Choi J, Allos H, Yatim K, Alhaddad J, Eskandari S, Chu P, Mihali AB, Lape IT, Lima Filho MP, Aoyama BT, Chandraker A, Safa K, Markmann JF, Riella LV, Formica RN, Skog J, Azzi JR: Discovery and validation of a urinary exosome mRNA signature for the diagnosis of human kidney transplant rejection. *J Am Soc Nephrol*, 2021 10.1681/ASN.2020060850
45. Freitas RCC, Bortolin RH, Genvigir FDV, Bonezi V, Hirata TDC, Felipe CR, Tedesco-Silva H, Jr., Medina-Pestana JO, Cerda A, Doi SQ, Hirata MH, Hirata RDC: Differentially expressed urinary exo-miRs and clinical outcomes in kidney recipients on short-term tacrolimus therapy: a pilot study. *Epigenomics*, 12: 2019-2034, 2020 10.2217/epi-2020-0160
46. Kim MH, Lee YH, Seo JW, Moon H, Kim JS, Kim YG, Jeong KH, Moon JY, Lee TW, Ihm CG, Kim CD, Park JB, Chung BH, Kim YH, Lee SH: Urinary exosomal viral microRNA as a marker of BK virus nephropathy in kidney transplant recipients. *PLoS One*, 12: e0190068, 2017 10.1371/journal.pone.0190068
47. Sole C, Moline T, Vidal M, Ordi-Ros J, Cortes-Hernandez J: An exosomal urinary miRNA signature for early diagnosis of renal fibrosis in lupus nephritis. *Cells*, 8, 2019 10.3390/cells8080773
48. Sole C, Cortes-Hernandez J, Felip ML, Vidal M, Ordi-Ros J: miR-29c in urinary exosomes as predictor of early renal fibrosis in lupus nephritis. *Nephrol Dial Transplant*, 30: 1488-1496, 2015 10.1093/ndt/gfv128
49. Tangtanatakul P, Klinchanhom S, Sodsai P, Sutichet T, Promjeen C, Avihingsanon Y, Hirankarn N: Down-regulation of let-7a and miR-21 in urine exosomes from lupus nephritis patients during disease flare. *Asian Pac J Allergy Immunol*, 37: 189-197, 2019 10.12932/AP-130318-0280
50. Perez-Hernandez J, Forner MJ, Pinto C, Chaves FJ, Cortes R, Redon J: Increased urinary exosomal microRNAs in patients with systemic lupus erythematosus. *PLoS One*, 10: e0138618, 2015 10.1371/journal.pone.0138618
51. Garcia-Vives E, Sole C, Moline T, Vidal M, Agraz I, Ordi-Ros J, Cortes-Hernandez J: The urinary exosomal miRNA expression profile is predictive of clinical response in lupus nephritis. *Int J Mol Sci*, 21, 2020 10.3390/ijms21041372
52. Qin Z, Hu H, Sun W, Chen L, Jin S, Xu Q, Liu Y, Yu L, Zeng S: miR-224-5p contained in urinary extracellular vesicles regulates PD-L1 expression by inhibiting Cyclin D1 in renal cell carcinoma cells. *Cancers (Basel)*, 13, 2021 10.3390/cancers13040618
53. De Palma G, Sallustio F, Curci C, Galleggiante V, Rutigliano M, Serino G, Ditunno P, Battaglia M, Schena FP: The three-gene signature in urinary extracellular vesicles from patients with clear cell renal cell carcinoma. *J Cancer*, 7: 1960-1967, 2016 10.7150/jca.16123
54. Song S, Long M, Yu G, Cheng Y, Yang Q, Liu J, Wang Y, Sheng J, Wang L, Wang Z, Xu B: Urinary exosome miR-30c-5p as a biomarker of clear cell renal cell carcinoma that inhibits progression by targeting HSPA5. *J Cell Mol Med*, 23: 6755-6765, 2019 10.1111/jcmm.14553

55. Kurahashi R, Kadomatsu T, Baba M, Hara C, Itoh H, Miyata K, Endo M, Morinaga J, Terada K, Araki K, Eto M, Schmidt LS, Kamba T, Linehan WM, Oike Y: MicroRNA-204-5p: a novel candidate urinary biomarker of Xp11.2 translocation renal cell carcinoma. *Cancer Sci*, 110: 1897-1908, 2019 10.1111/cas.14026
56. Yu Y, Bai F, Qin N, Liu W, Sun Q, Zhou Y, Yang J: Non-proximal renal tubule-derived urinary exosomal miR-200b as a biomarker of renal fibrosis. *Nephron*, 139: 269-282, 2018 10.1159/000487104
57. Lv CY, Ding WJ, Wang YL, Zhao ZY, Li JH, Chen Y, Lv J: A PEG-based method for the isolation of urinary exosomes and its application in renal fibrosis diagnostics using cargo miR-29c and miR-21 analysis. *Int Urol Nephrol*, 50: 973-982, 2018 10.1007/s11255-017-1779-4
58. Lv LL, Cao YH, Pan MM, Liu H, Tang RN, Ma KL, Chen PS, Liu BC: CD2AP mRNA in urinary exosome as biomarker of kidney disease. *Clin Chim Acta*, 428: 26-31, 2014 10.1016/j.cca.2013.10.003
59. Lv LL, Cao YH, Ni HF, Xu M, Liu D, Liu H, Chen PS, Liu BC: MicroRNA-29c in urinary exosome/microvesicle as a biomarker of renal fibrosis. *Am J Physiol Renal Physiol*, 305: F1220-1227, 2013 10.1152/ajprenal.00148.2013
60. Khurana R, Ranches G, Schafferer S, Lukasser M, Rudnicki M, Mayer G, Huttenhofer A: Identification of urinary exosomal noncoding RNAs as novel biomarkers in chronic kidney disease. *RNA*, 23: 142-152, 2017 10.1261/rna.058834.116
61. Lange T, Artelt N, Kindt F, Stracke S, Rettig R, Lendeckel U, Chadjichristos CE, Kavvadas P, Chatziantoniou C, Endlich K, Endlich N: MiR-21 is up-regulated in urinary exosomes of chronic kidney disease patients and after glomerular injury. *J Cell Mol Med*, 23: 4839-4843, 2019 10.1111/jcmm.14317
62. Perez-Hernandez J, Olivares D, Forner MJ, Ortega A, Solaz E, Martinez F, Chaves FJ, Redon J, Cortes R: Urinary exosome miR-146a is a potential marker of albuminuria in essential hypertension. *J Transl Med*, 16: 228, 2018 10.1186/s12967-018-1604-6
63. Feng Y, Lv LL, Wu WJ, Li ZL, Chen J, Ni HF, Zhou LT, Tang TT, Wang FM, Wang B, Chen PS, Crowley SD, Liu BC: Urinary exosomes and exosomal CCL2 mRNA as biomarkers of active histologic injury in IgA nephropathy. *Am J Pathol*, 188: 2542-2552, 2018 10.1016/j.ajpath.2018.07.017
64. Magayr TA, Song X, Streets AJ, Vergoz L, Chang L, Valluru MK, Yap HL, Lannoy M, Haghghi A, Simms RJ, Tam FWK, Pei Y, Ong ACM: Global microRNA profiling in human urinary exosomes reveals novel disease biomarkers and cellular pathways for autosomal dominant polycystic kidney disease. *Kidney Int*, 98: 420-435, 2020 10.1016/j.kint.2020.02.008
65. Bhayana S, Song F, Jacob J, Fadda P, Denko NC, Xu-Welliver M, Chakravarti A, Jacob NK: Urinary miRNAs as biomarkers for noninvasive evaluation of radiation-induced renal tubular injury. *Radiat Res*, 188: 626-635, 2017 10.1667/RR14828.1
66. Ramezani A, Devaney JM, Cohen S, Wing MR, Scott R, Knoblach S, Singhal R, Howard L, Kopp JB, Raj DS: Circulating and urinary microRNA profile in focal segmental glomerulosclerosis: a pilot study. *Eur J Clin Invest*, 45: 394-404, 2015 10.1111/eci.12420
67. Ichii O, Otsuka-Kanazawa S, Horino T, Kimura J, Nakamura T, Matsumoto M, Toi M, Kon Y: Decreased miR-26a expression correlates with the progression of podocyte injury in autoimmune glomerulonephritis. *PLoS One*, 9: e110383, 2014 10.1371/journal.pone.0110383
68. Zhou H, Kajiyama H, Tsuji T, Hu X, Leelahavanichkul A, Vento S, Frank R, Kopp JB, Trachtman H, Star RA, Yuen PS: Urinary exosomal Wilms' tumor-1 as a potential biomarker for podocyte injury. *Am J Physiol Renal Physiol*, 305: F553-559, 2013 10.1152/ajprenal.00056.2013
69. Yun CY, Lim JH, Oh JH, Cho AY, Lee KY, Sun IO: Urinary exosomal microRNA-21 as a marker for scrub typhus-associated acute kidney injury. *Genet Test Mol Biomarkers*, 25: 140-144, 2021 10.1089/gtmb.2020.0238

70. Spanu S, van Roeyen CR, Denecke B, Floege J, Muhlfield AS: Urinary exosomes: a novel means to non-invasively assess changes in renal gene and protein expression. *PLoS One*, 9: e109631, 2014 10.1371/journal.pone.0109631
71. Sonoda H, Lee BR, Park KH, Nihalani D, Yoon JH, Ikeda M, Kwon SH: miRNA profiling of urinary exosomes to assess the progression of acute kidney injury. *Sci Rep*, 9: 4692, 2019 10.1038/s41598-019-40747-8
72. Dias F, Teixeira AL, Nogueira I, Morais M, Maia J, Bodo C, Ferreira M, Vieira I, Silva J, Lobo J, Sequeira JP, Mauricio J, Oliveira J, Palmeira C, Martins G, Kok K, Costa-Silva B, Medeiros R: Plasma extracellular vesicle-derived TIMP-1 mRNA as a prognostic biomarker in clear cell renal cell carcinoma: a pilot study. *Int J Mol Sci*, 21, 2020 10.3390/ijms21134624
73. Horie K, Kawakami K, Fujita Y, Matsuda Y, Arai T, Suzui N, Miyazaki T, Koie T, Mizutani K, Ito M: Serum exosomal gamma-glutamyltransferase activity increased in patients with renal cell carcinoma with advanced clinicopathological features. *Oncology*, 98: 734-742, 2020 10.1159/000508688
74. Fujii N, Hirata H, Ueno K, Mori J, Oka S, Shimizu K, Kawai Y, Inoue R, Yamamoto Y, Matsumoto H, Shimabukuro T, Udoh K, Hoshii Y, Dahiya R, Matsuyama H: Extracellular miR-224 as a prognostic marker for clear cell renal cell carcinoma. *Oncotarget*, 8: 109877-109888, 2017 10.18632/oncotarget.22436
75. Muramatsu-Maekawa Y, Kawakami K, Fujita Y, Takai M, Kato D, Nakane K, Kato T, Tsuchiya T, Koie T, Miura Y, Ito M, Mizutani K: Profiling of serum extracellular vesicles reveals miRNA-4525 as a potential biomarker for advanced renal cell carcinoma. *Cancer Genomics Proteomics*, 18: 253-259, 2021 10.21873/cgp.20256
76. Dias F, Teixeira AL, Nogueira I, Morais M, Maia J, Bodo C, Ferreira M, Silva A, Vilhena M, Lobo J, Sequeira JP, Mauricio J, Oliveira J, Kok K, Costa-Silva B, Medeiros R: Extracellular vesicles enriched in hsa-miR-301a-3p and hsa-miR-1293 dynamics in clear cell renal cell carcinoma patients: potential biomarkers of metastatic disease. *Cancers (Basel)*, 12, 2020 10.3390/cancers12061450
77. Vergori L, Martinez MC, Bigot P: Circulating large extracellular vesicles carrying CA9 in the diagnosis and prognosis of clear-cell renal cell carcinoma. *Clin Transl Med*, 11: e358, 2021 10.1002/ctm2.358
78. Zhang W, Ni M, Su Y, Wang H, Zhu S, Zhao A, Li G: MicroRNAs in serum exosomes as potential biomarkers in clear-cell renal cell carcinoma. *Eur Urol Focus*, 4: 412-419, 2018 10.1016/j.euf.2016.09.007
79. Xiao CT, Lai WJ, Zhu WA, Wang H: MicroRNA derived from circulating exosomes as noninvasive biomarkers for diagnosing renal cell carcinoma. *Onco Targets Ther*, 13: 10765-10774, 2020 10.2147/OTT.S271606
80. Zhang J, Wang W, Chen S, Wang Y, Xia S: Distinct non-invasive evaluation values of tumor-derived cell-free microRNAs, circulating microvesicles and exosomal microRNAs after renal carcinoma cryoablation. *Biochem Biophys Res Commun*, 503: 1278-1283, 2018 10.1016/j.bbrc.2018.07.037
81. Saejong S, Townamchai N, Somparn P, Tangtanatakul P, Ondee T, Hirankarn N, Leelahavanichkul A: MicroRNA-21 in plasma exosome, but not from whole plasma, as a biomarker for the severe interstitial fibrosis and tubular atrophy (IF/TA) in post-renal transplantation. *Asian Pac J Allergy Immunol*, 2020 10.12932/AP-101019-0656
82. Qamri Z, Pelletier R, Foster J, Kumar S, Momani H, Ware K, Von Visger J, Satoskar A, Nadasdy T, Brodsky SV: Early posttransplant changes in circulating endothelial microparticles in patients with kidney transplantation. *Transpl Immunol*, 31: 60-64, 2014 10.1016/j.trim.2014.06.006

83. Kim H, Bae YU, Jeon JS, Noh H, Park HK, Byun DW, Han DC, Ryu S, Kwon SH: The circulating exosomal microRNAs related to albuminuria in patients with diabetic nephropathy. *J Transl Med*, 17: 236, 2019 10.1186/s12967-019-1983-3
84. Verbree-Willemsen L, Zhang YN, Ibrahim I, Ooi SBS, Wang JW, Mazlan MI, Kuan WS, Chan SP, Peelen LM, Grobbee DE, Richards AM, Lam CSP, de Kleijn DPV: Extracellular vesicle Cystatin C and CD14 are associated with both renal dysfunction and heart failure. *ESC Heart Fail*, 7: 2240-2249, 2020 10.1002/ehf2.12699
